# Supplementary material for: Explaining the Decrease in U.S. Deaths from Coronary Disease, 1980–2000
Source: Atypon-hosted journal article supplement (doi:10.1056/nejmsa053935), 2007-06-06
Supplement: nejm_ford_2388sa1.pdf [file nejm_ford_2388sa1.pdf]

## Supplementary Appendix

This appendix has been provided by the authors to give readers additional information about their work.

Supplement to: Ford ES, Ajani UA, Croft JB, et al. Explaining the decrease in U.S. deaths from coronary disease, 1980–2000. *N Engl J Med* 2007;356:2388-98.

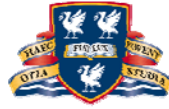

THE UNIVERSITY  
*of* LIVERPOOL

**IMPACT, A VALIDATED, COMPREHENSIVE  
CORONARY HEART DISEASE MODEL**

**SUPPLEMENTARY APPENDIX**

**for the**

**US MODEL**

**Simon Capewell, Earl Ford, Don Hayes,  
Martin O'Flaherty, Julia Critchley & Belgin Unal,**

**November 2006**

## SUPPLEMENTARY APPENDIX FOR THE IMPACT MODEL

---

| <b>Contents</b>                                                                                                                                       | <b>Page</b> |
|-------------------------------------------------------------------------------------------------------------------------------------------------------|-------------|
| <i>Table 1.</i> <b>The USA IMPACT Model: Introduction detailed methodology and examples of deaths prevented or postponed (DPP) calculations</b>       | 3           |
| <i>Table 2.</i> <b>Main data sources for the parameters used in the USA IMPACT Model</b>                                                              | 12          |
| <i>Table 3.</i> <b>Clinical efficacy of interventions:</b> relative risk reductions obtained from meta-analyses, and randomised controlled trials     | 15          |
| <i>Table 4.</i> <b>Data sources for treatment uptake levels in USA 2000:</b> Medical and surgical treatments included in the model                    | 24          |
| <i>Table 5.</i> <b>Age-specific case fatality rates for each patient group</b>                                                                        | 26          |
| <i>Table 6.</i> <b>Specific beta coefficients for major risk factors:<br/>Data sources, values and comments.</b>                                      | 27          |
| <i>Table 7.</i> <b>Relative risk values for CHD mortality: diabetes and physical inactivity</b> (Best, minimum and maximum estimates from InterHeart) | 29          |
| <i>Table 8.</i> <b>US IMPACT Model Risk Factor Methodology: Rationale for choice of regression or PARF approaches for specific risk factors</b>       | 30          |
| <i>Table 9.</i> <b>Assumptions and overlap adjustments used in the USA IMPACT Model</b>                                                               | 34          |

---

## **Table 1. THE USA IMPACT MODEL: INTRODUCTION and DETAILED METHODOLOGY**

The tables included in this supplementary appendix document provide details about the methods that were used in creating the US IMPACT model. This model examines the effects of changes in treatments and risk factors trends on changes in mortality from coronary heart disease (CHD) among US adults aged 25-84 years. Earlier versions of the IMPACT mortality model have been previously applied to data from Europe, New Zealand and China.<sup>1-5</sup> This cell-based mortality model, developed in Microsoft Excel, has been described in detail online and elsewhere.<sup>1, 6-8</sup>

### **Changes in mortality rates from CHD, USA 1980-2000**

Data sources used in examining the changes in mortality rates from 1980 to 2000 among US adults aged 25-84 years are shown in Table 2. Mortality rates from CHD were calculated using the underlying cause of death: International Classification of Diseases (ICD)-9 codes 410-414, 429.2 and ICD-10 codes I20-I25. Both unadjusted and age-adjusted mortality rates were calculated. Age-standardization was done using the direct method based on the US projected 2000 population.

### ***Expected and observed number of deaths from CHD***

The data sources needed to estimate the expected and observed number of deaths from CHD for 2000 are shown in Table 2. The expected number of deaths from CHD in 2000 was calculated by multiplying the age-specific mortality rates from CHD in 1980 by the population counts for 2000 in that age-stratum. Summing over all age strata then yielded the *expected* numbers of deaths from CHD. The difference between the number of *expected* and *observed* number of deaths from CHD represents the mortality fall, the total number of *deaths prevented or postponed (DPPs)* from the combined changes in treatment patterns and risk factor prevalence.

## Treatments

The treatment arm of the Model includes the following populations of patients:

- those hospitalized with an acute myocardial infarction (AMI),
- patients admitted to the hospital with unstable angina,
- community-dwelling patients who have survived an AMI,
- patients who have undergone revascularisation procedure (coronary artery bypass grafting (CABG), or a percutaneous transluminal coronary angioplasty (PTCA), with or without stent.
- community-dwelling patients with angina pectoris (no revascularisation)
- patients admitted to hospital with heart failure,
- community-dwelling patients with heart failure (no hospital admission).
- Hypertensive individuals eligible for hypotensive therapy
- Hypercholesterolaemic subjects eligible for cholesterol lowering therapy

The main data sources used to estimate the numbers of these groups are shown in Table 2.

For each of the groups, we estimated the number of DPPs that were attributable to various treatments. A listing of the treatments that were considered in the model and the data sources used to estimate the percentages of patients receiving treatments are shown in Tables 3 and 4.

The general approach to calculating the number of DPPs from an intervention among a particular patient group was first to stratify by age and sex, then to multiply the estimated number of patients in the year 2000 by the proportion of these patients receiving a particular treatment, by the 1-year case-fatality rate, and by the relative reduction in the case-fatality rate due to the administered treatment. Sources for estimates of efficacy (relative risk reductions) are shown in Table 3. Sources for treatment uptakes are shown in Table 4.

Age-specific case-fatality rates for each patient group are presented in Table 5.

We assumed that compliance (concordance), the proportion of treated patients actually taking therapeutically effective levels of medication, was 100% among hospital patients, 70% among symptomatic community patients, and 50% among asymptomatic community patients.<sup>6, 8-10</sup>

All these assumptions were tested in subsequent sensitivity analyses.

### **EXAMPLE 1: estimation of DPPs from a specific treatment**

For example, in the United States in 2000, about 102,280 men aged 55-64 were hospitalized with AMI in 2000 of whom approximately 84% were given aspirin.<sup>11</sup> Aspirin use reduces case-fatality rate by approximately 15%.<sup>12</sup> The underlying 1-year case-fatality rate in these men was approximately 5.4%.<sup>13</sup> The DPPs for at least a year were therefore calculated as

***Patient numbers x treatment uptake x relative mortality reduction x one-year case fatality***

= 102,280 x 84% x 15% X 5.4% = 696 deaths prevented or postponed.

This calculation was then repeated

- a) for men and women in each age group, and
- b) incorporating a Mant and Hicks adjustment for multiple medications
- c) using maximum and minimum values for each parameter in each group, to generate a sensitivity analysis (see below).

## Risk factors

The second part of the IMPACT model involves estimating the number of coronary heart disease DPPs related to changes in cardiovascular risk factor levels in the population. The US IMPACT model includes smoking, total cholesterol, systolic blood pressure, body mass index, diabetes, and physical activity. Data sources used to calculate the trends in the prevalence (or mean values) of the specific risk factors are shown in Table 2.

Two approaches to calculating DPPs from changes in risk factors were used. In the **regression approach**—used for systolic blood pressure, total cholesterol, and body mass index--the number of deaths from CHD occurring in 1980 (the base year) were multiplied by the absolute change in risk factor prevalence, and by a regression coefficient quantifying the change in CHD mortality that would result from the change in risk factor level. Natural logarithms were used, as is conventional, in order to best describe the log-linear relationship between changes in risk factor levels and mortality.

### **EXAMPLE 2: estimation of DPPs from risk factor change using regression method:**

#### ***Mortality fall due to reduction in systolic blood pressure in women aged 55-64***

For example, in 1980, there were 26,352 CHD deaths among 12,629,000 women aged 55-64 years. Mean systolic blood pressure in this group then decreased by 3.09 mmHg (from 136.00 in 1980 to 132.91 mmHg in 2000). The largest meta-analysis reports an estimated age- and sex-specific reduction in mortality of 50 percent for every 20 mmHg reduction in systolic blood pressure, generating a logarithmic coefficient of  $-0.035$ .<sup>14</sup>

The number of deaths prevented or postponed as a result of this change was then estimated as:

$$= (1 - (\text{EXP}(\text{coefficient} * \text{change}))) * \text{deaths in 1980}$$

$$= (1 - \text{EXP}(-0.035 * 3.09)) * 26,352 = 2701$$

This calculation was then repeated

- a) for men and women in each age group, and
- b) using maximum and minimum values in each group, to generate a sensitivity analysis.

Data sources for the number of CHD deaths are shown in Table 2, sources for the population means of risk factors are shown in Table 2, and sources for the coefficients used in these analyses are listed in Table 6.

### **EXAMPLE 3: estimation of DPPs from risk factor change using PARF method**

The **population-attributable risk factor (PARF) approach** was used for smoking, diabetes, and physical activity. PARF was calculated conventionally as

$$(P \times (RR-1)) / (1+P \times (RR-1))$$

where P is the prevalence of the risk factor and RR is the relative risk for CHD mortality associated with that risk factor. DPPs were then estimated as the CHD deaths in 1980 (the base year) multiplied by the difference in the PARF for 1980 and 2000.

For example, the prevalence of diabetes among men aged 65-74 years was 14.5% in 1980 and 20.7% in 2000. Assuming a Relative Risk of 1.93,<sup>15</sup> the PARF was 0.119 in 1980 and 0.161 in 2000. The number of deaths attributable to the increase in diabetes prevalence from 1980 to 2000 was therefore

the CHD deaths in 1980,  $(123055) * (0.161 - 0.119) = 5168$  DPPs

This calculation was then repeated

- a) for men and women in each age group,
- b) for physical inactivity and smoking
- c) using maximum and minimum values in each group, to generate a sensitivity analysis

Data sources for the prevalence of risk factors and for the number of CHD deaths are shown in Table 2. Sources for the relative risks used in these PARF analyses are listed in Table 7. All come from the InterHeart study,<sup>15</sup> the largest international study to provide *independent* RR values, adjusted for other major risk factors.

The rationale for choosing the regression or PARF approaches for specific risk factors in the US IMPACT Model is detailed in Table 8.

## OTHER METHODOLOGICAL CONSIDERATIONS

Several methodological issues will be discussed below. These include adjusting the relative reduction in case-fatality rate for patients receiving multiple treatments, establishing rules for avoiding double-counting individual patients who may fall into more than a single disease category (patient group), treatment overlaps, and sensitivity analyses.

## POLYPHARMACY ISSUES

Individual CHD patients may take a number of different medications. However, data from randomized clinical trials on efficacy of treatment combinations are sparse. Mant and Hicks suggested a method to estimate case-fatality reduction by polypharmacy.<sup>16</sup> This approach was subsequently endorsed by Yusuf<sup>17</sup> and Law and Wald.<sup>18</sup>

### **EXAMPLE 4: estimation of reduced benefit if patient taking multiple medications (Mant and Hicks approach)**

If we take the example of **secondary prevention following acute myocardial infarction**, good evidence (Table 3) suggests that, for each intervention, the relative reduction in case fatality is approximately: aspirin 15%, beta-blockers 23%, ACE inhibitors 20%, statins 22% and rehabilitation 26%. The Mant and Hicks approach suggests that in individual patients receiving all these interventions, case-fatality reduction is very unlikely to be simply additive, i.e. not **106%** (15% + 23% + 20% + 22% + 26%). Instead, having considered the 15% case fatality reduction achieved by aspirin, the next medication, in this case a beta-blocker, can only reduce the **residual** case fatality (1-15%). Likewise, the subsequent addition of an ACE inhibitor can then only decrease the **remaining** case fatality, which will be  $1 - [(1 - 0.15) \times (1 - 0.23)]$ .

The Mant and Hicks approach therefore suggests that a **cumulative relative benefit** can be estimated as follows:

Relative Benefit = 1 - [(1-relative reduction in case-fatality rate for treatment A) X (1- relative reduction in case-fatality rate for treatment B) X ...X (1- relative reduction in case-fatality rate for treatment N).

In considering appropriate treatments for AMI survivors, applying relative risk reductions (RRR) for aspirin, beta-blockers ACE inhibitors statins and rehabilitation then gives:

$$\begin{aligned} \text{Relative Benefit} &= 1 - [(1 - \text{aspirin RRR}) \times (1 - \text{beta-blockers RRR}) \times (1 - \text{ACE inhibitors RRR}) \times (1 - \text{statins RRR}) \times (1 - \text{rehabilitation RRR})] \\ &= 1 - [(1 - 0.15) \times (1 - 0.23) \times (1 - 0.20) \times (1 - 0.22) \times (1 - 0.26)] \\ &= 1 - [(0.85) \times (0.77) \times (0.80) \times (0.78) \times (0.74)] \\ &= \mathbf{0.70 \text{ i.e. a 70\% lower case fatality}} \end{aligned}$$

This represents a **34%** relative reduction (0.70/1.06) on the simple additive value of **106%**.

### **Potential overlaps between patient groups: avoiding double counting**

There are potential overlaps between CHD patient groups (Table 9).

For example, approximately half the patients having CABG surgery have a previous AMI,<sup>6</sup> approximately 25% of AMI survivors develop heart failure within 12 months<sup>19</sup>, and over 50% of CHD patients have a history of hypertension.<sup>20</sup> All these assumptions were tested in subsequent sensitivity analyses.

### **SENSITIVITY ANALYSES**

Because of uncertainties surrounding many of the values, a multi-way sensitivity analysis was performed using the analysis of extremes method.<sup>21</sup> For each model parameter, a lower and upper value was assigned using either 95% confidence intervals where available (for instance therapeutic effectiveness quantified as a relative risk reduction in the relevant

meta-analyses), or otherwise plus or minus 20%.

An analysis of extremes was therefore performed whereby the maximum and minimum feasible values were fed in to the model. By multiplying through, the resulting product then generated maximum and minimum estimates for deaths prevented or postponed (Table below).

**EXAMPLE: sensitivity analysis for AMI patients given aspirin**

An example of calculating lower and upper-bound estimates for DPPs for treatment with aspirin among men aged 55-64 years who were hospitalized with an AMI is presented here. 95% confidence intervals from the meta-analysis were used for relative mortality reduction; lower and upper bound estimates for the other parameters were calculated as minus or plus 20% [except for treatment uptake that was capped at 99%]. Multiplying all the lower-bound estimates yielded the minimum [lower bound] estimate and multiplying the upper-bound estimates yielded the maximum [upper bound] estimate.

|                  | <b>Patient numbers</b> | <b>Treatment Uptake</b> | <b>Relative Mortality Reduction*</b> | <b>One year case fatality</b> | <b>Deaths prevented or postponed</b> |
|------------------|------------------------|-------------------------|--------------------------------------|-------------------------------|--------------------------------------|
|                  | <b>A</b>               | <b>B</b>                | <b>C</b>                             | <b>D</b>                      | <b>(A x B x C x D)</b>               |
| Best Estimate    | 102,280                | 0.84                    | 15%                                  | 5.4%                          | 696                                  |
| Minimum estimate | 81,824                 | 0.67                    | 11%*                                 | 4.3%                          | 259                                  |
| Maximum estimate | 122,736                | 0.99                    | 19%*                                 | 6.5%                          | 1501                                 |

\* 95% CI from the Antithrombotic Trialists' Collaboration meta-analysis<sup>12</sup>, see Table 3.

This approach may be described as a “robust” approach for two reasons.

a) maximum and minimum values for each variable were deliberately forced to provide a wider range rather than a narrower one, e.g. relative mortality reduction  $\pm 20\%$  rather than say,  $\pm 10\%$ .

b) the resulting product, for instance the minimum estimate, was generated by assuming that the lowest feasible values all occurred at the same time, a most unlikely situation.

**Table 2. Main Data Sources for the Parameters Used in the USA IMPACT Model**

|                                                                  | 1980                                                             | 2000                                                            |
|------------------------------------------------------------------|------------------------------------------------------------------|-----------------------------------------------------------------|
| Population statistics (number)                                   | U.S. Census Bureau                                               | U.S. Census Bureau                                              |
| Deaths by age and sex (number)                                   | National Vital Statistics System                                 | National Vital Statistics System                                |
| CHD Mortality (rates)                                            | National Vital Statistics System<br>(ICD-9 codes 410-414, 429.2) | National Vital Statistics System<br>(ICD-10 codes I20-I25)      |
| <b>NUMBER OF PATIENTS ADMITTED YEARLY</b>                        |                                                                  |                                                                 |
| Myocardial infarction: ICD9: 410, 411                            | NHDS                                                             | NHDS, MEPS                                                      |
| Angina pectoris: ICD9: 413                                       | NHDS                                                             | NHDS                                                            |
| Heart failure: ICD9: 425.4, 425.5, 425.9, 428.0, 428.1 and 428.9 | NHDS                                                             | NHDS, MEPS                                                      |
| Number of patients treated with CABG: ICD-9 36.1                 | NHDS                                                             | NHDS                                                            |
| PTCA: ICD9 36.01-36.05                                           | NHDS                                                             | NHDS                                                            |
| <b>Cardiopulmonary resuscitation in the community</b>            |                                                                  |                                                                 |
| Numbers                                                          | Seattle and Olmsted county surveys                               | Seattle and Olmsted county surveys                              |
| Uptake                                                           | Seattle and Olmsted county surveys<br>NHDS                       | Seattle and Olmsted county surveys<br>NHDS                      |
| <b>Acute myocardial infarction</b>                               |                                                                  |                                                                 |
| Hospital Resuscitation                                           | Seattle and Olmsted county surveys<br>NHDS                       | Seattle and Olmsted county surveys<br>Literature review<br>NHDS |
| Thrombolysis                                                     | NRMI, NHDS                                                       | NRMI, NHDS                                                      |
| Primary angioplasty                                              | NRMI, NHDS                                                       | NRMI, NHDS                                                      |
| Aspirin                                                          | NRMI                                                             | NRMI                                                            |
| Beta blockers                                                    | Assume zero                                                      | NRMI                                                            |
| ACE inhibitors                                                   | Assume zero                                                      | NRMI                                                            |
| Primary CABG surgery                                             | Assume zero                                                      | NRMI                                                            |
| Primary PTCA (angioplasty)                                       | Assume zero                                                      | NRMI                                                            |
| <b>Angina pectoris: unstable</b>                                 |                                                                  |                                                                 |
| Prevalence                                                       | Extrapolated                                                     | CRUSADE                                                         |
| Platelet IIB/IIIA Inhibitors                                     | Assume zero                                                      | Literature review                                               |
| Aspirin alone                                                    | Assume zero                                                      | Literature review                                               |
| Aspirin & Heparin                                                | Assume zero                                                      | Literature review                                               |
| Primary CABG surgery                                             | Assume zero                                                      | NRMI                                                            |
| Primary PTCA (angioplasty)                                       | Assume zero                                                      | NRMI                                                            |

**Secondary prevention following AMI**

|                |             |                                 |
|----------------|-------------|---------------------------------|
| Aspirin        | Assume zero | NHANES 1999-2000,<br>BRFSS 2000 |
| Beta blockers  | Assume zero | NHANES 1999-2000                |
| ACE inhibitors | Assume zero | NHANES 1999-2000                |
| Statins        | Assume zero | NHANES 1999-2000                |
| Warfarin       | Assume zero | NHANES 1999-2000                |
| Rehabilitation | Assume zero | NHANES 1999-2000                |

**Secondary prevention following CABG or PTCA**

|                |             |                  |
|----------------|-------------|------------------|
| Aspirin        | Assume zero | NHANES 1999-2000 |
| Beta blockers  | Assume zero | NHANES 1999-2000 |
| ACE inhibitors | Assume zero | NHANES 1999-2000 |
| Statins        | Assume zero | NHANES 1999-2000 |
| Warfarin       | Assume zero | NHANES 1999-2000 |
| Rehabilitation | Assume zero | NHANES 1999-2000 |

**Congestive Heart Failure**

|                |             |                  |
|----------------|-------------|------------------|
| ACE inhibitors | Assume zero | NHANES 1999-2000 |
| Beta blockers  | Assume zero | NHANES 1999-2000 |
| Spironolactone | Assume zero | NHANES 1999-2000 |
| Aspirin        | Assume zero | NHANES 1999-2000 |
| Statins        | Assume zero | NHANES 1999-2000 |

**Treatment for chronic angina**

|                    |             |      |
|--------------------|-------------|------|
| CABG surgery       | NHDS        | NHDS |
| PTCA (angioplasty) | Assume zero | NHDS |

**Community angina pectoris: total**

|            |                     |                  |
|------------|---------------------|------------------|
| Prevalence | NHANES II (1976-80) | NHANES 1999-2000 |
| Aspirin    | Assume zero         | NHANES 1999-2000 |
| Statins    | Assume zero         | NHANES 1999-2000 |

**Community Chronic heart failure**

|                |                     |                  |
|----------------|---------------------|------------------|
| Prevalence     | NHANES II (1976-80) | NHANES 1999-2000 |
| ACE inhibitors | Assume zero         | NHANES 1999-2000 |
| Beta blockers  | Assume zero         | NHANES 1999-2000 |
| Spironolactone | Assume zero         | NHANES 1999-2000 |
| Aspirin        | Assume zero         | NHANES 1999-2000 |
| Statins        | Assume zero         | NHANES 1999-2000 |

**Hypertension**

|             |                     |                  |
|-------------|---------------------|------------------|
| Prevalence  | NHANES II (1976-80) | NHANES 1999-2000 |
| Treated (%) | NHANES II (1976-80) | NHANES 1999-2000 |

**Statins etc for primary prevention**

|                          |                     |                  |
|--------------------------|---------------------|------------------|
| Hypercholesterolemia (%) | NHANES II (1976-80) | NHANES 1999-2000 |
| Treated (%)              | Assume zero         | NHANES 1999-2000 |

**POPULATION RISK FACTOR PREVALENCE**

|                         |                                      |                   |
|-------------------------|--------------------------------------|-------------------|
| Current smoking         | NHANES II (1976-80),                 | NHANES 1999-2000, |
| Systolic blood pressure | NHANES II (1976-80)                  | NHANES 1999-2000  |
| Cholesterol             | NHANES II (1976-80)                  | NHANES 1999-2000  |
| Physical activity       | BRFSS 1985 (extrapolated to<br>1980) | BRFSS 2000        |
| Obesity (BMI)           | NHANES II (1976-80)                  | NHANES 1999-2000  |
| Diabetes                | NHANES II (1976-80)                  | NHANES 1999-2000  |

*Key*

ACE denotes angiotensin-converting enzyme, AMI acute myocardial infarction, BRFSS Behavioral Risk Factor Surveillance System, CABG coronary artery bypass graft surgery, ICD International Classification of Diseases, MEPS Medical Expenditure Panel Survey, NHANES National Health and Nutrition Examination Survey, NHDS, National Hospital Discharge Survey, NHIS, National Health Interview Survey, NRMI, National Registry of Myocardial Infarction, and PTCA percutaneous transluminal coronary angioplasty.

**Table 3. Clinical efficacy of interventions: relative risk reductions obtained from meta-analyses, and randomised controlled trials\***

| TREATMENTS                         | Relative Risk Reduction<br>(95% CI) | Comments                                                                                                                                                                                      | Source paper:<br>First author (year), notes                     |
|------------------------------------|-------------------------------------|-----------------------------------------------------------------------------------------------------------------------------------------------------------------------------------------------|-----------------------------------------------------------------|
| <b>Acute myocardial infarction</b> |                                     |                                                                                                                                                                                               |                                                                 |
| Thrombolysis                       | 31%<br>(95% CI: 14, 45)             | <55 yrs: OR=0.692; RRR=30.8 (95% CI: 14-45)<br>55-64 yrs: OR=0.736; RRR=26.4 (95% CI: 17-40)<br>65-74 yrs: OR=0.752; RRR=24.8 (95% CI: 15-37)<br>>75 yrs: OR=0.844; RRR=15.6 (95% CI: 4-30)   | Estess(2002) <sup>22</sup> , [updated FTT]                      |
| Aspirin                            | 15%<br>(95% CI: 11, 19)             | OR=0.85 (95% CI: 0.81, 0.89). RRR 15% (95% CI: 11,19)<br>page 75:outcome is vascular and nonvascular deaths                                                                                   | Antithrombotic<br>Trialists' Collaboration (2002) <sup>12</sup> |
| Primary angioplasty<br>STEMI       | 32%<br>(95% CI: 5, 50)              | OR 0.68 (95% CI: 0.50, 0.95). RRR 32% (95% CI: 5,50)<br>outcome compares primary angioplasty to thrombolytics, not specific to STEMI, in results on page 3.                                   | Cucherat (2003). <sup>23</sup>                                  |
| Primary PTCA Non-<br>STEMI         | 32%<br>(95% CI: 5, 51)              | OR 0.65 (95% CI: 0.49, 0.95). RRR 32% (95% CI: 5,51) for cardiovascular death on page 917. [RRR for cardiovascular death or MI was 26 (95% CI: 3,44) and was 24 (95% CI: 0,42) for any death] | RITA 3 (Fox 2005) <sup>24</sup>                                 |
| Primary CABG surgery               | 39%<br>(95% CI: 23, 52)             | OR 0.61 (95% CI: 0.48, 0.77). RRR 39% (95% CI: 23,52) on page 565, 0-5 yr mortality                                                                                                           | Yusuf (1994) <sup>25</sup>                                      |

|                                                 |                         |                                                                                                                                                                                                                                                                                                                                                                                                                                                                                                                                                                                                                                                                                                                                                                                                                                                                                              |                                                                                                    |
|-------------------------------------------------|-------------------------|----------------------------------------------------------------------------------------------------------------------------------------------------------------------------------------------------------------------------------------------------------------------------------------------------------------------------------------------------------------------------------------------------------------------------------------------------------------------------------------------------------------------------------------------------------------------------------------------------------------------------------------------------------------------------------------------------------------------------------------------------------------------------------------------------------------------------------------------------------------------------------------------|----------------------------------------------------------------------------------------------------|
| Beta blockers                                   | 4%<br>(95% CI: -8, 15)  | OR 0.96 (95% CI: 0.85, 1.08), RR 4% (95% CI: -8,15) on page 1732.                                                                                                                                                                                                                                                                                                                                                                                                                                                                                                                                                                                                                                                                                                                                                                                                                            | Freemantle (1999) <sup>26</sup>                                                                    |
| ACE inhibitors                                  | 7%<br>(95% CI: 2, 11)   | OR 0.93, (0.89, 0.98), RR 7% (2,11) for 30 day mortality in MI.                                                                                                                                                                                                                                                                                                                                                                                                                                                                                                                                                                                                                                                                                                                                                                                                                              | ACE Inhibitor Myocardial Infarction Collaborative Group 1998. <sup>27</sup>                        |
| <b>Cardio-pulmonary resuscitation<br/>(CPR)</b> |                         |                                                                                                                                                                                                                                                                                                                                                                                                                                                                                                                                                                                                                                                                                                                                                                                                                                                                                              |                                                                                                    |
| Community<br>CPR USA                            | 5%<br>(95% CI: 4, 15.3) | Nichol study reports overall median survival to discharge at 7.4% in this multi-country/site review, page 520<br>The Model focuses on 30/7 survival. Discharge survival will therefore provide an over-estimate, which we have explicitly addressed by assuming 5% at 30/7.<br>Rea looks at odds of bystander dispatcher assisted CPR and bystander CPR without dispatch assistance and compares to No bystander CPR. 7265 out-of-hospital arrests attended. OR 0.59 - 0.69 for these two groups which would give RRRs of 41% and 31%. [Consider as crude equivalent of CPR to no CPR comparison]. 15.3% survival to discharge in King-county, WA; consider as maximum value. Use Nichol (1999) <sup>28</sup> 5% as USA average.<br>Graham et al 1999 meta analysis of papers 1973 - 1996 report 6.4% at discharge. Assume better in 2000, thus 6.4% at 30/7<br>OPALS RCT reports only 5.2%. | Nichol (1999) <sup>28</sup><br>Rea (2001) <sup>29</sup>                                            |
| Hospital CPR<br>USA                             | 33%<br>(95% CI: 10, 36) | AMI accounted for 35% of adult total cases. Adult survival to discharge 36% post VF or VT (majority of post AMI cases, only 10.6% post Asystole,<br>Adult survival to discharge 18% overall, but this reflected ALL Medical arrests in hospital. (varied from 10-36%                                                                                                                                                                                                                                                                                                                                                                                                                                                                                                                                                                                                                         | Nadkarni (2006) <sup>30</sup><br>NHDS discharge codes (2000)<br>Tunstall-Pedoe(1992) <sup>31</sup> |

|                                                    |                         |                                                                                                                                                                                                                                                                                                                                                                                                                                                                                                                                                                                                                                                                                                                           |                                                                 |
|----------------------------------------------------|-------------------------|---------------------------------------------------------------------------------------------------------------------------------------------------------------------------------------------------------------------------------------------------------------------------------------------------------------------------------------------------------------------------------------------------------------------------------------------------------------------------------------------------------------------------------------------------------------------------------------------------------------------------------------------------------------------------------------------------------------------------|-----------------------------------------------------------------|
|                                                    |                         | <p>depending on type of initial rhythm) (tables 4 &amp; 5 page 55)<br/> Review of 36,000 adults with cardiac arrests in the 253 US/Canadian Hospitals National Registry of CPR. Nadkarni, JAMA, 2006:295 (1) 50-57)<br/> Older article from Tunstall-Pedoe on page 1350 shows survival at 24 hrs to be 32%, discharge to home at 21%, and 1 year survival to be 15% overall. (16% and 8% in general wards, 31% and 16% in coronary care unit (page 1349), etc. Assume in USA 2000 is better.<br/> Corroboration: Model assumes that approximately 2% AMI admissions have primary VF (Olmsted County study). This is consistent with NHDS discharge code of CPR in 0.74% (2000), suggesting approximately 1/3 survive.</p> |                                                                 |
| <b><i>Secondary Prevention in CHD Patients</i></b> |                         |                                                                                                                                                                                                                                                                                                                                                                                                                                                                                                                                                                                                                                                                                                                           |                                                                 |
| Aspirin                                            | 15%<br>(95% CI: 11, 19) | OR 0.85 (95% CI: 0.49, 0.95), RR 15% (95% CI: 11, 19)<br>outcome is vascular and nonvascular deaths on page 75. This data seems to be appropriate to this outcome in CHD patients                                                                                                                                                                                                                                                                                                                                                                                                                                                                                                                                         | Antithrombotic<br>Trialists' Collaboration (2002) <sup>12</sup> |
| Beta blockers                                      | 23%<br>(95% CI: 15, 31) | OR 0.77 (95% CI: 0.85, 0.69), 23% (95% CI: 15,31) on page 1734. Odds of death in long term trials.                                                                                                                                                                                                                                                                                                                                                                                                                                                                                                                                                                                                                        | Freemantle (1999) <sup>26</sup>                                 |
| ACE inhibitors                                     | 20%<br>(95% CI: 13, 26) | OR 0.80 (95% CI: 0.74, 0.87), 20% (95% CI: 13,26) on page 1577, death up to 4 years [endpoint of study looking at those with heart failure or LV dysfunction.]                                                                                                                                                                                                                                                                                                                                                                                                                                                                                                                                                            | Flather (2000) <sup>32</sup>                                    |

|                |                         |                                                                                                                                                                                                                                                                                                                                                                                                                                                                                                                    |                                                                                                        |
|----------------|-------------------------|--------------------------------------------------------------------------------------------------------------------------------------------------------------------------------------------------------------------------------------------------------------------------------------------------------------------------------------------------------------------------------------------------------------------------------------------------------------------------------------------------------------------|--------------------------------------------------------------------------------------------------------|
| Statins        | 22%<br>(95% CI: 10, 26) | OR=0.78 (95% CI: 0.74—0.84). RRR=22% (95% CI: 10, 26)<br>RR=0.77 (95% CI: 0.68—0.87). RRR=23% (95% CI: 13,30)<br>in those with other CHD                                                                                                                                                                                                                                                                                                                                                                           | Cholesterol Treatment Trialists' Collaborators (2005) <sup>33</sup>                                    |
|                |                         | OR=0.77 (95% CI: 0.71-0.83). RRR=23% (95% CI: 17, 29)<br>Wilt (2004) Section CHD mortality, page 1430.                                                                                                                                                                                                                                                                                                                                                                                                             | Wilt (2004) <sup>34</sup>                                                                              |
|                |                         |                                                                                                                                                                                                                                                                                                                                                                                                                                                                                                                    |                                                                                                        |
| Warfarin       | 22%<br>(95% CI: 13, 31) | OR=0.78 (95% CI: 0.67-0.90), RRR=22% (95% CI: 10, 33)<br>Meta-analysis looking at oral anticoagulant therapy in coronary artery disease (31 trials about 18,000 patients) by intensity of INR control: High intensity (INR>2.8) warfarin vs. control for outcome of death had OR of 0.78(95% CI: 0.69-0.87) corresponding to a RRR of 22% (95% CI: 13, 31); Moderate intensity warfarin (INR 2-3.0) vs. control had OR of 0.82 (95% CI: 0.23-2.33) not significant but corresponding RRR of 18% (95% CI: -133, 77) | Anand and Yusuf (1999) <sup>35</sup><br>Lau (1992) <sup>36</sup> . Table 1, page 253 (anticoagulants). |
| Rehabilitation | 26%<br>(95% CI: 10, 39) | OR= 0.74 (95% CI: 0.61-0.90), RRR = 26% (95% CI: 10, 39)<br>in Fig 1, page 685 Taylor reference.                                                                                                                                                                                                                                                                                                                                                                                                                   | Taylor (2004) <sup>37</sup>                                                                            |

| <i>Chronic Angina</i>                      |                      |                                                                                                                                                                                                          |                                                                                                                                                                                     |
|--------------------------------------------|----------------------|----------------------------------------------------------------------------------------------------------------------------------------------------------------------------------------------------------|-------------------------------------------------------------------------------------------------------------------------------------------------------------------------------------|
| CABG surgery years 0-5                     | 39% (95% CI: 23, 52) | OR= 0.61 (95% CI: 0.48-0.77), RR 39% (95% CI: 23,52) on page 565, 5 yr mortality                                                                                                                         | Yusuf (1994) <sup>25</sup>                                                                                                                                                          |
| CABG surgery years 6-10                    | 32% (95% CI: 2, 30)  | OR= 0.83 (95% CI: 0.70-0.98), RR 17 (95% CI: 2,30) on page 565, 10 yr mortality<br>OR= 0.68 (95% CI: 0.56-0.83), RR 32 (95% CI: 17,44) on page 565, 7 yr mortality<br>CABG compared to medical treatment | Yusuf (1994) <sup>25</sup>                                                                                                                                                          |
| Angioplasty in chronic angina, with stents | 13% (95% CI: 0, 16)  | OR=0.87 (95% CI: 0.52-1.45), RRR=13% (95% CI: -45, 48)                                                                                                                                                   | BASKET RCT (Lancet 2005 366, 921) <sup>38</sup> : Comparison of drug eluting stents vs. bare metal stents<br>Folland (1997) <sup>39</sup> Table 3, all deaths, 60 months follow up. |
|                                            |                      | Maximum benefit, assume equivalent to CABG surgery for two vessel disease CABG, OR 0.84, (RR 16% 2, 30) 5 year survival 88% in controls.<br>Minimum assumption: NIL benefit                              | Yusuf (1994) <sup>25</sup><br>Pocock (1995) <sup>40</sup> : No difference between PTCA and CABG as initial revasc procedure.<br>Ditto Bucher (2000) <sup>41</sup>                   |

|                                              |                               |                                                                                                                                                                       |                                                                     |
|----------------------------------------------|-------------------------------|-----------------------------------------------------------------------------------------------------------------------------------------------------------------------|---------------------------------------------------------------------|
| Aspirin                                      | 15%<br>(95% CI: 11, 19)       | OR= 0.85 (95% CI: 0.81-0.89), RR 15% (95% CI: 11,19)<br>outcome is vascular and nonvascular deaths on page 75.                                                        | Antithrombotic<br>Trialists' Collaboration (2002) <sup>12</sup>     |
| Statins                                      | <b>22%</b><br>(95% CI: 10-26) | RR=0.78 (95% CI: 0.74—0.84). RRR=22% (95% CI: 10, 26)<br>RR=0.77 (95% CI: 0.68—0.87). RRR=23% (95% CI: 13,30)<br>in those with other CHD                              | Cholesterol Treatment Trialists' Collaborators (2005) <sup>33</sup> |
| <b><i>Unstable Angina</i></b>                |                               |                                                                                                                                                                       |                                                                     |
| Aspirin alone                                | 15%<br>(95% CI: 11, 19)       | OR= 0.85 (95% CI: 0.81-0.89), RR 15% (95% CI: 11,19)<br>outcome is vascular and nonvascular deaths on page 75.<br>Assume appropriate for unstable angina patients     | Antithrombotic<br>Trialists' Collaboration (2002) <sup>12</sup>     |
| Aspirin & Heparin                            | 33%<br>(95% CI: -2,56)        | OR 0.67 (95% CI: 0.48,1.02) RR 33% (95% CI: -2, 56) in<br>table 2. The study outcome is composite MI death and non<br>fatal MI, compares those on ASA+Hep to ASA only | Oler (1996) <sup>42</sup> .<br>.                                    |
| Platelet glycoprotein<br>IIB/IIIA inhibitors | 9%<br>(95% CI: 2,16)          | RR 0.91 (95% CI: 0.84, 0.98) RR 9% (95% CI: 2,16) study<br>looked at acute coronary syndrome without persistent ST<br>elevation                                       | Boersma (2002) <sup>43</sup>                                        |
| Primary PTCA Non-<br>STEMI                   | 32%<br>(95% CI: 5-51)         | OR 0.68 (95% CI: 0.49, 0.95). RRR 32% (95% CI: 5, 51) for                                                                                                             | RITA 3 (Fox 2005) <sup>24</sup><br>Cardiovascular deaths, table 3   |
| Primary CABG<br>surgery                      | <b>43%</b><br>(95% CI: 19,60) | OR 0.57 (95% CI: 0.40, 0.81). RR 43% (95% CI: 19,60)<br>reduction in mortality at 5 years in those with class III/IV<br>angina, table 4, page 566.                    | Yusuf (1994) <sup>25</sup>                                          |

|                                                                   |                      |                                                                                                                                                                                                     |                                                                     |
|-------------------------------------------------------------------|----------------------|-----------------------------------------------------------------------------------------------------------------------------------------------------------------------------------------------------|---------------------------------------------------------------------|
| <b><i>Heart failure in patients requiring hospitalisation</i></b> |                      |                                                                                                                                                                                                     |                                                                     |
| ACE inhibitors                                                    | 20% (95% CI: 13,26)  | OR 0.80 (95% CI: 0.74, 0.87). RR 20% (95% CI: 13,26) on page 1577, [death up to 4 years was study endpoint for those with heart failure or LV dysfunction].                                         | Flather (2000) <sup>32</sup>                                        |
| Beta blockers                                                     | 35% (95% CI: 26,43)  | OR 0.65 (95% CI: 0.57, 0.74). RR 35% (95% CI: 26,43) : all cause mortality                                                                                                                          | Shibata (2001) <sup>44</sup>                                        |
| Spirinolactone                                                    | 30% (95% CI: 18, 41) | OR 0.70 (95% CI: 0.59, 0.82). RR 30% (95% CI: 18,41) in those that had at least one cardiac related hospitalization. [ 31% (95% CI: 18-42) in entire study population of those with CHF, page 711 ] | Pitt (1999) <sup>45</sup>                                           |
| Aspirin                                                           | 15% (95% CI: 11,19)  | OR= 0.85 (95% CI: 0.81, 0.89), RR 15% (95% CI: 11,19) outcome is vascular and nonvascular deaths on page 75.                                                                                        | Antithrombotic Trialists' Collaboration (2002) <sup>12</sup>        |
| Statins                                                           | 22% (95% CI: 10-26%) | OR=0.78 (95% CI: 0.74, 0.84). RRR=22% (95% CI: 10-26), post AMI<br>OR=0.77 (95% CI: 0.68, 0.87). RRR=23% (95% CI: 13,30) in those with other CHD                                                    | Cholesterol Treatment Trialists' Collaborators (2005) <sup>33</sup> |

|                                              |                         |                                                                                                                                                                                               |                                                                     |
|----------------------------------------------|-------------------------|-----------------------------------------------------------------------------------------------------------------------------------------------------------------------------------------------|---------------------------------------------------------------------|
| <b><i>Heart failure in the community</i></b> |                         |                                                                                                                                                                                               |                                                                     |
| ACE inhibitors                               | 20%<br>(95% CI: 13,26)  | OR 0.80 (95% CI: 0.74, 0.87). RR 20% (95% CI: 13,26) on page 1577, death up to 4 years [in those with heart failure or LV dysfunction].                                                       | Flather (2000) <sup>32</sup>                                        |
| Beta blockers                                | 35% (95% CI: 26,43)     | OR 0.65 (95% CI: 0.57, 0.74). RR 35 (95% CI: 26,43).<br>Section 3.3 page 353                                                                                                                  | Shibata (2001) <sup>44</sup>                                        |
| Spirolactone                                 | 31%<br>(95% CI: 18, 42) | OR 0.69 (95% CI: 0.58, 0.82). RR 31% (95% CI: 18-42) in entire study population consisting of those with CHF, page 711 [30 (95% CI: 18, 41) in those with a cardiac related hospitalization]. | Pitt (1999) <sup>45</sup>                                           |
| Aspirin                                      | 15%<br>(95% CI: 11, 19) | OR= 0.85 (0.81, 0.89), RR 15% (11,19) outcome is vascular and nonvascular deaths on page 75. Assume appropriate for patients with CHF due to CHD                                              | Antithrombotic Trialists' Collaboration (2002) <sup>46</sup>        |
| Statins                                      | 22%<br>(95% CI: 10-26%) | OR=0.78 (95% CI: 0.74, 0.84). RRR=22% (95% CI: 10-26)<br>OR=0.77 (95% CI: 0.68, 0.87). RRR=23% (95% CI: 13,30) in those with other CHD                                                        | Cholesterol Treatment Trialists' Collaborators (2005) <sup>33</sup> |

|                                                                      |                         |                                                                                                                                                                                                           |                              |
|----------------------------------------------------------------------|-------------------------|-----------------------------------------------------------------------------------------------------------------------------------------------------------------------------------------------------------|------------------------------|
| <b><i>Hypertension treatment</i></b>                                 |                         |                                                                                                                                                                                                           |                              |
|                                                                      | 13%<br>(95% CI: 6,19)   | OR 0.87 (95% CI: 0.81, 0.94). RRR 13% (95% CI: 6, 19) in those with high blood pressure without disease at entry. [RRR 29% (95% CI: 17, 37) those with average blood pressure and CHD, treated with ACEI] | Law (2003) <sup>47</sup>     |
| <b><i>Therapies for primary prevention of raised cholesterol</i></b> |                         |                                                                                                                                                                                                           |                              |
| Statins                                                              | 35%<br>(95% CI: 11, 52) | OR 0.65 (95% CI: 0.48, 0.89). 35% (95% CI: 11,52) for CHD mortality (only trials using statins), figure 3 on page 4                                                                                       | Pignone (2000) <sup>48</sup> |
| Gemfibrozil                                                          | 7%<br>(95% CI: -8, 19)  | OR 0.93 (95% CI: 0.81, 1.08); RRR 7% (95% CI: -8, 19)                                                                                                                                                     | Studer (2005) <sup>49</sup>  |
| Niacin                                                               | 5%<br>(95% CI: -10, 18) | OR 0.95 (95% CI: 0.82, 1.10); RRR 5% (95% CI: -10, 0.18)                                                                                                                                                  | Studer (2005) <sup>49</sup>  |

\* Relative Risk Reduction calculated as 1- Odds Ratio

**Table 4. Data sources for treatment uptake levels in USA 2000: Medical and surgical treatments included in the model**

| <i>TREATMENTS</i>                           | <b>Treatment Uptake<br/>in 2000 (as reported<br/>in source<sup>#</sup>)</b> | <b>Source (year)</b>                                                         |
|---------------------------------------------|-----------------------------------------------------------------------------|------------------------------------------------------------------------------|
| <b>ACUTE MYOCARDIAL INFARCTION</b>          |                                                                             |                                                                              |
| Thrombolysis                                | 20.8%                                                                       | Rogers (2000): National Registry of Myocardial Infarction 1999 <sup>11</sup> |
| Aspirin                                     | 84%                                                                         |                                                                              |
| Primary angioplasty                         | 7.3%                                                                        |                                                                              |
| Primary CABG                                | 9%                                                                          |                                                                              |
| Intravenous beta blockers                   | 19%                                                                         |                                                                              |
| ACE inhibitors                              | 23%                                                                         |                                                                              |
| Cardio-pulmonary resuscitation              |                                                                             |                                                                              |
| In the Community                            | 45% *                                                                       | Rea (2001) <sup>29</sup><br>Culley (1991) <sup>50</sup>                      |
| In Hospital                                 | 2% **                                                                       | Bunch (2003) <sup>51</sup><br>NHDS discharge code CPR (2000)                 |
| <b>SECONDARY PREVENTION IN CHD PATIENTS</b> |                                                                             |                                                                              |
| Aspirin                                     | 39%                                                                         | NHANES 1999-2000, Foody (2003) <sup>52</sup>                                 |
| Beta blockers                               | 34%                                                                         | NHANES 1999-2000                                                             |
| ACE inhibitors                              | 26%                                                                         | NHANES 1999-2000                                                             |
| Statins                                     | 35%                                                                         | NHANES 1999-2000                                                             |
| Warfarin                                    | 9%                                                                          | NHANES 1999-2000                                                             |
| Rehabilitation                              | 27%                                                                         | (CDC 2003): BRFSS 2001 <sup>53</sup>                                         |
| <b>CHRONIC ANGINA</b>                       |                                                                             |                                                                              |
| CABG surgery                                | 100%                                                                        | NHDS 2000                                                                    |
| Angioplasty                                 | 100%                                                                        | NHDS 2000                                                                    |
| Aspirin in community                        | 51%                                                                         | NHANES 1999-2000                                                             |
| Statins in community                        | 50%                                                                         | NHANES 1999-2000                                                             |
| <b>UNSTABLE ANGINA</b>                      |                                                                             |                                                                              |
| Aspirin & Heparin                           | 60%                                                                         | Shahi (2001) <sup>54</sup><br>(Maximum 86% from CRUSADE 2003)                |
| Aspirin alone                               | 20%                                                                         | Shahi (2001) <sup>54</sup>                                                   |
| Platelet glycoprotein IIB/IIIA inhibitors   | 25%                                                                         | Peterson (2003) <sup>55</sup>                                                |
| CABG surgery for UA                         | 20%                                                                         | NHDS 2000                                                                    |
| Angioplasty for UA                          | 30%                                                                         | NHDS 2000                                                                    |

| <b>HEART FAILURE INCLUDING A HOSPITAL ADMISSION</b> |       |                  |
|-----------------------------------------------------|-------|------------------|
| ACE inhibitors                                      | 43%   | NHANES 1999-2000 |
| Beta blockers                                       | 27%   |                  |
| Spironolactone                                      | 5.5%  |                  |
| Aspirin                                             | 24%   |                  |
| Statins                                             | 22.5% |                  |
| <b>HEART FAILURE IN THE COMMUNITY</b>               |       |                  |
| ACE inhibitors                                      | 47%   | NHANES 1999-2000 |
| Beta blockers                                       | 30%   |                  |
| Spironolactone                                      | 7%    |                  |
| Aspirin                                             | 29%   |                  |
| Statins                                             | 29%   |                  |
| <b>HYPERTENSION TREATMENTS</b>                      | 58%   | NHANES 1999-2000 |
| <b>HYPERLIPIDAEMIA - 1' PREVENTION</b>              |       |                  |
| Statins                                             | 16%   | NHANES 1999-2000 |
| Gemfibrozil                                         | 2%    |                  |
| Niacin                                              | 2%    |                  |

# Uptake percentages as reported in source papers. Values may differ from those in Table 1 of manuscript, which report weighted averages for ALL age groups 25-84 years included in the Model.

\* Exemplar King County claims to reach 50% out-of-hospital arrests. Assume US average lower, 45%.

AHA statistics suggest 335,000 out-of-hospital CHD deaths. Rea (2001)<sup>29</sup> King County, suggests 1.89 per 1000 HMO adults, 1986-1994, 4% per year decline to 2000, suggests approximately 204,530 out-of-hospital cardiac arrests. Culley (1991)<sup>50</sup> suggested that 3754 arrests treated by emergency medical service in 4 years in King County with a population of 1.75 million; suggests approximately 1073 per million per year locally. Hence, suggests a USA maximum total of about 300,320 out-of-hospital cardiac arrests.

\*\* Assume approximately 2% of AMI admissions have primary ventricular fibrillation (Olmsted county);<sup>51</sup> 2% is consistent with NHDS discharge code for cardiopulmonary resuscitation in 0.74% (2000), i.e. given that approximately 1/3 survive.

**Table 5.** Age-specific case fatality rates for each patient group

| <b>GROUP</b>    | <b>AMI</b>    | <b>Post AMI</b>  | <b>Unstable Angina</b>    | <b>CABG surgery</b> | <b>Angioplasty</b> | <b>Heart Failure<br/><i>Hospital</i></b> | <b>Community</b> | <b>Hypertension</b> | <b>Hypercholesterolemia</b> |
|-----------------|---------------|------------------|---------------------------|---------------------|--------------------|------------------------------------------|------------------|---------------------|-----------------------------|
| <i>Interval</i> | <b>30 day</b> | <b>One year*</b> | <b>One year*</b>          | <b>One year*</b>    | <b>One year*</b>   | <b>One year</b>                          | <b>One year</b>  | <b>One year</b>     | <b>One year</b>             |
| <b>Mean</b>     | 0.084         | 0.051            | 0.069                     | 0.020               | 0.016              | 0.246                                    | 0.081            | 0.010               | 0.006                       |
| <b>MEN</b>      |               |                  |                           |                     |                    |                                          |                  |                     |                             |
| <b>25-34</b>    | 0.011         | 0.008            | 0.016                     | 0.003               | 0.003              | 0.034                                    | 0.011            | 0.000               | 0.000                       |
| <b>35-44</b>    | 0.012         | 0.009            | 0.024                     | 0.005               | 0.005              | 0.068                                    | 0.022            | 0.001               | 0.001                       |
| <b>45-54</b>    | 0.023         | 0.017            | 0.034                     | 0.007               | 0.007              | 0.096                                    | 0.032            | 0.002               | 0.002                       |
| <b>55-64</b>    | 0.054         | 0.034            | 0.056                     | 0.012               | 0.012              | 0.140                                    | 0.045            | 0.006               | 0.006                       |
| <b>65-74</b>    | 0.101         | 0.073            | 0.070                     | 0.023               | 0.025              | 0.283                                    | 0.093            | 0.014               | 0.014                       |
| <b>75-84</b>    | 0.164         | 0.122            | 0.091                     | 0.042               | 0.042              | 0.337                                    | 0.111            | 0.035               | 0.035                       |
| <b>85+</b>      | 0.279         | 0.189            | 0.118                     | 0.075               | 0.074              | 0.418                                    | 0.138            | 0.094               | 0.094                       |
| <b>WOMEN</b>    |               |                  |                           |                     |                    |                                          |                  |                     |                             |
| <b>25-34</b>    | 0.011         | 0.004            | 0.016                     | 0.003               | 0.003              | 0.034                                    | 0.011            | 0.000               | 0.000                       |
| <b>35-44</b>    | 0.013         | 0.006            | 0.024                     | 0.005               | 0.005              | 0.068                                    | 0.022            | 0.001               | 0.001                       |
| <b>45-54</b>    | 0.026         | 0.010            | 0.034                     | 0.007               | 0.007              | 0.096                                    | 0.032            | 0.001               | 0.001                       |
| <b>55-64</b>    | 0.061         | 0.019            | 0.056                     | 0.012               | 0.012              | 0.140                                    | 0.045            | 0.002               | 0.002                       |
| <b>65-74</b>    | 0.114         | 0.084            | 0.070                     | 0.023               | 0.027              | 0.222                                    | 0.081            | 0.007               | 0.007                       |
| <b>75-84</b>    | 0.167         | 0.116            | 0.091                     | 0.042               | 0.039              | 0.289                                    | 0.094            | 0.021               | 0.021                       |
| <b>85+</b>      | 0.267         | 0.177            | 0.118                     | 0.075               | 0.061              | 0.368                                    | 0.121            | 0.079               | 0.079                       |
| <b>SOURCE</b>   | Medicare      | Medicare         | Van Domberg <sup>13</sup> | Medicare            | Medicare           | Medicare                                 | Medicare         | NHANES              | & Vital Statistics          |

\*excluding heart failure patients (already considered within heart failure groups)

**Table 6. Specific Beta Coefficients For Major Risk Factors: Data sources, values and comments.**

Estimated  $\beta$  coefficients from multiple regression analyses for the relationship between absolute changes in population mean risk factors and % changes in coronary heart disease mortality for men and women, stratified by age.

| SYSTOLIC BLOOD PRESSURE                    | Age groups (years) |               |               |               |               |
|--------------------------------------------|--------------------|---------------|---------------|---------------|---------------|
|                                            | 25-44              | 45-54         | 55-64         | 65-74         | 75-84         |
| <b>Men</b> (hazard ratio per 20 mmHg)      | <b>0.49</b>        | <b>0.49</b>   | <b>0.52</b>   | <b>0.58</b>   | <b>0.65</b>   |
| <b>Men</b> (log hazard ratio per 1 mmHg)   | <b>-0.036</b>      | <b>-0.035</b> | <b>-0.032</b> | <b>-0.027</b> | <b>-0.021</b> |
| Min                                        | -0.029             | -0.028        | -0.026        | -0.022        | -0.017        |
| Max                                        | -0.043             | -0.042        | -0.039        | -0.032        | -0.025        |
| <b>Women</b> (hazard ratio per 20 mmHg)    | <b>0.40</b>        | <b>0.40</b>   | <b>0.49</b>   | <b>0.52</b>   | <b>0.59</b>   |
| <b>Women</b> (log hazard ratio per 1 mmHg) | <b>-0.046</b>      | <b>-0.046</b> | <b>-0.035</b> | <b>-0.032</b> | <b>-0.026</b> |
| Min                                        | -0.037             | -0.037        | -0.028        | -0.026        | -0.021        |
| Max                                        | -0.055             | -0.055        | -0.042        | -0.039        | -0.031        |

Source: Prospective studies collaborative meta-analysis, Lancet 2002<sup>60</sup>

\*UNITS: % mortality change per 20 mmHg change in Systolic BP

Strengths: massive dataset, includes US data, adjusted for regression dilution bias, consistent with randomized clinical trials, results stratified by sex and age, with 95% CIs

Limitations: some publication bias still possible.

**CHOLESTEROL**

|                                                           | Age groups (years) |                |                |                |                |                |
|-----------------------------------------------------------|--------------------|----------------|----------------|----------------|----------------|----------------|
|                                                           | 25-44              | 45-54          | 55-64          | 65-74          | 75-84          | 85+            |
| <b>Men &amp; Women (Mortality reduction per 1 mmol/l)</b> | <b>0.900</b>       | <b>0.650</b>   | <b>0.450</b>   | <b>0.333</b>   | <b>0.317</b>   | <b>0.250</b>   |
| <b>Log coefficient</b>                                    | <b>-1.2942</b>     | <b>-0.8238</b> | <b>-0.5245</b> | <b>-0.3719</b> | <b>-0.3512</b> | <b>-0.2709</b> |
| Lower 95% CI                                              | -1.035             | -0.659         | -0.420         | -0.298         | -0.281         | -0.217         |
| Upper 95% CI                                              | -1.553             | -0.989         | -0.629         | -0.446         | -0.421         | -0.325         |

Source: Law & Wald meta-analysis<sup>56</sup>

\*UNITS: % mortality change per 1 mmol/l (38.6 mg/dl) change in total cholesterol

Strengths: includes US data, adjusted for regression dilution bias, includes randomized clinical trials, RCT values consistent with observational data, results stratified by sex and age, with 95% CIs

Limitations: some publication bias still possible.

**BODY MASS INDEX (BMI)**

|                                                                                               | Age groups (years) |               |               |               |               |
|-----------------------------------------------------------------------------------------------|--------------------|---------------|---------------|---------------|---------------|
|                                                                                               | <44                | 45-59         | 60-69         | 70-79         | 80+           |
| Risk reduction per 1 kg/m <sup>2</sup> : James Asia Pacific data                              | 0.1100             | 0.0900        | 0.0500        | 0.0400        | 0.0300        |
| Asia Pacific age gradient therefore:                                                          | 1.22               | <b>1.00</b>   | 0.56          | 0.44          | 0.33          |
| Bogers relative risks, CHD deaths per 5 kg/m <sup>2</sup>                                     |                    | <b>1.16</b>   |               |               |               |
| Age specific relative risks per 1 kg/m <sup>2</sup> , applying age gradients from James et al | 1.04               | <b>1.03</b>   | 1.02          | 1.01          | 1.01          |
| <b>Men &amp; Women, log coefficients*</b>                                                     | <b>0.0363</b>      | <b>0.0297</b> | <b>0.0165</b> | <b>0.0132</b> | <b>0.0099</b> |
| Minimum values                                                                                | 0.0255             | 0.0209        | 0.0116        | 0.0093        | 0.0070        |
| Maximum values ( <i>from James et al</i> )                                                    | 0.0466             | 0.0381        | 0.0212        | 0.0169        | 0.0127        |

Source: Bogers et al.,<sup>57</sup> James et al. 2004<sup>58</sup>

\*UNITS: % mortality change per 1 kg/m<sup>2</sup> change in BMI

Strengths: Large number of studies included. Adjusted for blood pressure, total cholesterol, and physical activity. 95% CIs also provided.

Limitations: Observational data; age gradient applied from James study.

**Table 7. Relative Risks Used in the United States IMPACT Model for Smoking, Diabetes and Physical Inactivity for Coronary Heart Disease Mortality.** (Best, Minimum and Maximum Estimates from the InterHeart Study)  
(and see Introduction for a worked example)

**Yusuf InterHEART Study. Lancet 2004.<sup>15</sup> Odds ratios for relative effect of risk factors (99% Confidence Intervals, NOT 95%)**

|                              | Both sexes              |                         | Men                      |                         | Women                   |                         |
|------------------------------|-------------------------|-------------------------|--------------------------|-------------------------|-------------------------|-------------------------|
|                              | Young                   | Old                     | ≤55 years                | >55 years               | ≤65 years               | > 65 years              |
| <b>Lifestyle factors</b>     |                         |                         |                          |                         |                         |                         |
| <b>Smoking</b>               | <b>3.33 (2.86-3.87)</b> | <b>2.44 (2.10-2.84)</b> | <b>3.33 (2.80-3.95)</b>  | <b>2.52 (2.15-2.96)</b> | <b>4.49 (3.11-6.47)</b> | <b>2.14 (1.35-3.39)</b> |
| <b>Fruit and vegetables</b>  | 0.69 (0.58-0.81)        | 0.72 (0.61-0.85)        | 0.72 (0.59-0.88)         | 0.77 (0.64-0.93)        | 0.62 (0.44-0.87)        | 0.55 (0.38-0.80)        |
| <b>Exercise</b>              | <b>0.95 (0.79-1.14)</b> | <b>0.79 (0.66-0.94)</b> | <b>1.02 (0.83-1.25)*</b> | <b>0.79 (0.66-0.96)</b> | <b>0.74 (0.49-1.10)</b> | <b>0.75 (0.46-1.22)</b> |
| <b>Alcohol</b>               | 1.00 (0.85-1.17)        | 0.85 (0.73-1.00)        | 1.03 (0.87-1.23)         | 0.86 (0.73-1.01)        | 0.74 (0.41-1.31)        | 0.83 (0.49-1.42)        |
| <b>Hypertension</b>          | 2.24 (1.93-2.60)        | 1.72 (1.52-1.95)        | 1.99 (1.66-2.39)         | 1.72 (1.49-1.98)        | 2.94 (2.25-3.85)        | 1.82 (1.39-2.38)        |
| <b>Diabetes</b>              | <b>2.96 (2.40-3.64)</b> | <b>2.05 (1.71-2.45)</b> | <b>2.66 (2.04-3.46)</b>  | <b>1.93 (1.58-2.37)</b> | <b>3.53 (2.49-5.01)</b> | <b>2.59 (1.78-3.78)</b> |
| <b>Abdominal obesity</b>     | 1.79 (1.52-2.09)        | 1.50 (1.29-1.74)        | 1.83 (1.52-2.20)         | 1.54 (1.30-1.83)        | 1.58 (1.14-2.20)        | 1.22 (0.88-1.70)        |
| <b>Psychosocial</b>          | 2.87 (2.19-3.77)        | 2.43 (1.86-3.18)        | 2.62 (1.91-3.60)         | 2.45 (1.82-3.29)        | 3.92 (2.26-6.79)        | 2.31 (1.22-4.39)        |
| <b>High ApoB/ApoA1 ratio</b> | 4.35 (3.49-5.42)        | 2.50* (2.05-3.05)       | 4.16 (3.19-5.42)         | 2.51 (2.00-3.15)        | 4.83 (3.19-7.32)        | 2.48 (1.60-3.83)        |

Smoking, adverse lipid profile, hypertension, and diabetes had a greater relative effect on risk of acute myocardial infarction in younger than older individuals

\*The INTERHEART study quoted a value of only 1.02 for exercise in men aged <55 years. This was clearly an outlier. We have therefore assumed a value of 0.77 in line with men and women in the other age groups, and consistent with most other studies.<sup>59</sup>

**Table 8: US IMPACT Model Risk Factor Methodology: Rationale for choice of regression or PARF approaches for specific risk factors**

Modelling TREATMENT effects appears reasonably precise, because each treatment has a meta-analysis with a fairly well quantified efficacy value, plus 95% confidence intervals.

Quantifying the mortality reduction attributable to the change in a specific RISK FACTOR remains a less precise science. This table explains the rationale for choosing the best approach for each risk factor: regression based on absolute change in the risk factor\*, regression based on relative change in the risk factor\*, or population attributable risk fraction (PARF).

We also specify the best data source for each.

\*Absolute and Relative beta regression approaches are illustrated earlier in the Supplementary Appendix.

An ABSOLUTE beta regression coefficient quantifies the CHD mortality reduction for each UNIT change in risk factor, e.g. mmHg change for BP, or mg/dl change for cholesterol

A RELATIVE beta regression coefficient quantifies the CHD mortality reduction for each % relative change in risk factor, e.g. a 12 mmHg fall in SBP, from 120 mmHg to 108 mmHg, would represent a **10%** relative decrease (12/120).

| <b>Risk Factor</b>                                      | <b>Source</b>          | <b>Strengths</b>                                                                                                                  | <b>Limitations</b>                                                                                           | <b>Comments and recommendation</b>             | <b>DPP value in US Model (contribution to total CHD mortality fall)</b> |
|---------------------------------------------------------|------------------------|-----------------------------------------------------------------------------------------------------------------------------------|--------------------------------------------------------------------------------------------------------------|------------------------------------------------|-------------------------------------------------------------------------|
| <b>BLOOD PRESSURE</b>                                   |                        |                                                                                                                                   |                                                                                                              |                                                |                                                                         |
| 1. Systolic BP: regression using absolute beta approach | PSC 2002 <sup>14</sup> | Large meta-analyses include US data. Age and sex stratified. SBP preferable to DBP, because stronger relationship with CHD deaths | Observational data-assume complete reversibly of risk                                                        | CURRENT APPROACH Supersedes relative approach. | 68,880 (20%)                                                            |
| 2. Diastolic BP. Regression using absolute beta         | Law 2003 <sup>60</sup> | Appeared adequate in England and Whales model log linear.                                                                         | SBP superior to DBP as a risk factor for CHD. Generated a gross over-estimate when applied to US population. | Superseded                                     | 310,880 (91%)                                                           |
| 3. PARF                                                 | Midspan                | Original approach in Scottish IMPACT Model                                                                                        | Sensitive to reference value and category cut-offs. Estimated DPPs always appeared very low.                 | Obsolete                                       | -                                                                       |

|                                    |                                        |                                                                                                                                                                                                                  |                                                                                                                                                                                               |                                                                                  |                 |
|------------------------------------|----------------------------------------|------------------------------------------------------------------------------------------------------------------------------------------------------------------------------------------------------------------|-----------------------------------------------------------------------------------------------------------------------------------------------------------------------------------------------|----------------------------------------------------------------------------------|-----------------|
| <b>CHOLESTEROL</b>                 |                                        |                                                                                                                                                                                                                  |                                                                                                                                                                                               |                                                                                  |                 |
| 1. Regression using absolute Beta  | Law et al, meta-analysis <sup>61</sup> | Large meta-analysis, split by age and sex; cohort and RCT results very consistent; supported by more recent reviews                                                                                              | Published in 1994                                                                                                                                                                             | CURRENT APPROACH                                                                 | 82,830 (24%)    |
| 2. Regression using relative Beta* | Vartiainen 1994 <sup>62</sup>          | Appeared satisfactory in earlier IMPACT Models; similar to log-linear approach.                                                                                                                                  | Not log-linear                                                                                                                                                                                | Superseded                                                                       | 101,915 (30%)   |
| 3. PARF using quintiles            | Midspan                                | Used in 1996                                                                                                                                                                                                     | Sensitive to reference value and category cut-offs                                                                                                                                            | Obsolete since 1997                                                              | -               |
| <b>BMI</b>                         |                                        |                                                                                                                                                                                                                  |                                                                                                                                                                                               |                                                                                  |                 |
| 1. Regression using absolute Beta  | Bogers et al 2006 <sup>57</sup>        | Large meta-analysis with US data, Broadly consistent with Asian and PSC analyses; age-splits taken from James et al. Adjusted for major confounders: smoking, cholesterol, blood pressure, and physical activity | An “upstream” CHD risk factor. CHD risk partly or wholly mediated through “downstream factors: BP, cholesterol and impaired glucose tolerance. DPP values consistent with earlier US studies. | CURRENT APPROACH<br>Potential confounding addressed by using this adjusted value | -25,905 (-7.6%) |
| 2. Regression using relative Beta  | Never required                         |                                                                                                                                                                                                                  |                                                                                                                                                                                               |                                                                                  |                 |
| 3. PARF using OBESITY quintiles    | Inter Heart <sup>63</sup>              | Large, global study including US data                                                                                                                                                                            | Sensitive to reference value and category cut-offs. Under-estimation likely.                                                                                                                  | An arbitrary approach to a continuous variable. Superseded                       | -39,840 (-12%)  |

| <b>SMOKING</b>                    |                               |                                                                                                                                          |                                                                |                  |              |
|-----------------------------------|-------------------------------|------------------------------------------------------------------------------------------------------------------------------------------|----------------------------------------------------------------|------------------|--------------|
| 1. PARF                           | Inter Heart <sup>15</sup>     | Log linear. InterHeart large, global study including US data. RRs consistent with other studies. Appropriate for a dichotomous variable. | Regression approach might provide useful alternative approach? | CURRENT APPROACH | 39,925 (12%) |
| 2. Regression using absolute beta | Vartiainen 1994 <sup>62</sup> | Used in earlier IMPACT Models. Result consistent with PARF approach.                                                                     | Not dichotomous. Not log-linear                                | Superseded       | 47,380 (14%) |

| <b>DIABETES</b>        |                           |                                                                                                                        |                                                                |                  |                |
|------------------------|---------------------------|------------------------------------------------------------------------------------------------------------------------|----------------------------------------------------------------|------------------|----------------|
| 1. PARF approach       | Inter Heart <sup>15</sup> | Large, global study including US data. RRs consistent with other studies. Appropriate method for dichotomous variable. | Case control study, albeit huge.                               | CURRENT APPROACH | -33,465 (-10%) |
| 2. Regression approach | -                         | -                                                                                                                      | Appropriate Betas not identified, and methodologically dubious | Not attempted    | -              |
|                        |                           |                                                                                                                        |                                                                |                  |                |

| <b>PHYSICAL ACTIVITY</b> |                           |                                                                                                                        |                                                                                                                                       |                  |             |
|--------------------------|---------------------------|------------------------------------------------------------------------------------------------------------------------|---------------------------------------------------------------------------------------------------------------------------------------|------------------|-------------|
| 1. PARF approach         | Inter Heart <sup>15</sup> | Large, global study including US data. RRs consistent with other studies. Appropriate method for dichotomous variable. | Alternative PARF methods possible. Important to use independent RR values. (Aim to examine activity sub-categories in future studies) | CURRENT APPROACH | 17,445 (5%) |
| 2. Regression approach   | -                         | -                                                                                                                      | Appropriate Betas do not exist, and methodologically dubious                                                                          | Not attempted    | -           |
|                          |                           |                                                                                                                        |                                                                                                                                       |                  |             |

**Table 9. Main Assumptions and Overlap Adjustments Used in the USA IMPACT Model**

| Treatment category                                                     | ASSUMPTIONS AND OVERLAP ADJUSTMENTS                                                                                                                                                                                                                                                                                                    | Justification                                                                               |
|------------------------------------------------------------------------|----------------------------------------------------------------------------------------------------------------------------------------------------------------------------------------------------------------------------------------------------------------------------------------------------------------------------------------|---------------------------------------------------------------------------------------------|
| Post-AMI patients                                                      | Assume 25% already counted as HF patients<br>Therefore assume residual case fatality halved, having transferred these HF patients to the HF group                                                                                                                                                                                      | Unal (2004) <sup>3</sup><br>Unal (2004) <sup>3</sup>                                        |
| Post-CABG patients                                                     | Assume 2/3 had MI, already counted as Post AMI                                                                                                                                                                                                                                                                                         | Unal (2004) <sup>3</sup>                                                                    |
| Post-PTCA survivors                                                    | Assume 50% had prior AMI, already counted as Post AMI<br>Assume 25% also had CABG, thus already counted as Post CABG<br>Assume 25% had prior PTCA, i.e. repeats, already counted                                                                                                                                                       | Unal (2004) <sup>3</sup><br>NHDS<br>NHDS                                                    |
| Chronic angina treatment:<br>PTCA patients progressing to CABG surgery | Assume that 20% of PTCA go to CABG                                                                                                                                                                                                                                                                                                     | NHDS                                                                                        |
| Efficacy of PTCA in angina                                             | Assumed equivalent to CABG surgery for two vessel disease (maximum estimate), or equal to medical therapy (minimum estimate)                                                                                                                                                                                                           | Sculpher (1994) <sup>64</sup><br>Folland (1997) <sup>39</sup><br>Yusuf (1994) <sup>25</sup> |
| Angina in the community                                                | Start with the total patient numbers with angina in the community, based on NHANES prevalence<br>Then deduct patients counted elsewhere:<br>-Patients already treated for unstable angina in hospital,<br>-50% of those receiving CABG for angina<br>-50% of those receiving secondary prevention post AMI/post CABG/Post Angioplasty, | Capewell (2000) <sup>2</sup>                                                                |
| Heart failure in the community                                         | Based on NHANES prevalence<br>Assume 50% of heart failure is due to CHD<br>Deduct patients treated for severe heart failure in the hospital (already counted)                                                                                                                                                                          | NHANES 1999-2000                                                                            |
| Hypertension treatment:<br>overlaps with other CHD patient groups      | Total hypertensive patient numbers in community calculated, then deduct:<br>-50% of post AMI patients<br>-50% of community angina patients<br>-50% of community heart failure patients                                                                                                                                                 | NHANES 1999-2000                                                                            |
| Fall in population blood pressure                                      | Estimate the number of DPPs by hypertension treatment<br>-Then subtract this from the total DPPs attributed to the secular fall in population BP                                                                                                                                                                                       | Capewell (1999) <sup>65</sup><br>Capewell (2000) <sup>6</sup>                               |

AMI denotes acute myocardial infarction, CABG coronary artery bypass graft surgery, CHD coronary heart disease, DPPs deaths prevented or postponed, HF heart failure, NHANES National Health and Nutrition Examination Survey, and PTCA percutaneous transluminal coronary angioplasty.

### Reference List

1. Capewell S, Morrison CE, McMurray JJ. Contribution of modern cardiovascular treatment and risk factor changes to the decline in coronary heart disease mortality in Scotland between 1975 and 1994. *Heart* 1999;81:380-6.
2. Capewell S, Beaglehole R, Seddon M, McMurray J. Explanation for the decline in coronary heart disease mortality rates in Auckland, New Zealand, between 1982 and 1993. *Circulation* 2000;102:1511-6.
3. Unal B, Critchley J, Capewell S. Explaining the decline in coronary heart disease mortality in England and Wales, 1981-2000. *Circulation* 2004;109:1101-7.
4. Laatikainen T, Critchley J, Vartiainen E, Salomaa V, Ketonen M, Capewell S. Explaining the decline in coronary heart disease mortality in Finland between 1982 and 1997. *Am J Epidemiol* 2005;162:764-73.
5. Unal B, Critchley JA, Capewell S. Modelling the decline in coronary heart disease deaths in England and Wales, 1981-2000: comparing contributions from primary prevention and secondary prevention. *BMJ* 2005;331:614.
6. Capewell S, Beaglehole R, Seddon M, McMurray J. Explaining the decline in Coronary Heart Disease Mortality in Auckland, New Zealand between 1982 and 1993. *Circulation* 2000;102:1511-6.
7. Critchley J, Liu J, Zhao D, Wei W, Capewell S. Explaining the increase in coronary heart disease mortality in Beijing between 1984 and 1999. *Circulation* 2004;110:1236-44.
8. Unal B CJCS. IMPACT, a validated, comprehensive coronary heart disease model. 2-2-2006. Ref Type: Internet Communication
9. Butler J, Arbogast PG, BeLue R et al. Outpatient adherence to beta-blocker therapy after acute myocardial infarction. *J Am Coll Cardiol* 2002;40:1589-95.
10. Nichol MB, Venturini F, Sung JC. A critical evaluation of the methodology of the literature on medication compliance. *Ann Pharmacother* 1999;33:531-40.
11. Rogers WJ, Canto JG, Lambrew CT et al. Temporal trends in the treatment of over 1.5 million patients with myocardial infarction in the US from 1990 through 1999: the National Registry of Myocardial Infarction 1, 2 and 3. *J Am Coll Cardiol* 2000;36:2056-63.
12. Antithrombotic Trialists' Collaboration. Collaborative meta-analysis of randomised trials of antiplatelet therapy for prevention of death, myocardial infarction, and stroke in high risk patients. *BMJ* 2002;324:71-86.
13. van Domburg RT, Miltenburg-van-Zijl AJ, Veerhoek RJ, Simoons ML. Unstable angina: good long-term outcome after a complicated early course. *J Am Coll Cardiol* 1998;31:1534-9.
14. Lewington S, Clarke R, Qizilbash N, Peto R, Collins R. Age-specific relevance of usual blood pressure to vascular mortality: a meta-analysis of individual data for one million adults in 61 prospective studies. *Lancet* 2002;360:1903-13.

15. Yusuf S, Hawken S, Ounpuu S et al. Effect of potentially modifiable risk factors associated with myocardial infarction in 52 countries (the INTERHEART study): case-control study. *Lancet* 2004;364:937-52.
16. Mant J, Hicks N. Detecting differences in quality of care: the sensitivity of measures of process and outcome in treating acute myocardial infarction. *BMJ* 1995;311:793-6.
17. Yusuf S. Two decades of progress in preventing vascular disease. *Lancet* 2002;360:2-3.
18. Wald NJ, Law MR. A strategy to reduce cardiovascular disease by more than 80%. *BMJ* 2003;326:1419.
19. Fox KF, Cowie MR, Wood DA et al. Coronary artery disease as the cause of incident heart failure in the population. *Eur Heart J* 2001;22:228-36.
20. Erens B, Primatesta P. Health Survey for England. Cardiovascular Disease '98. London: Stationery Office; 1999.
21. Briggs A, Sculpher M, Buxton M. Uncertainty in the economic evaluation of health care technologies: the role of sensitivity analysis. *Health Economics* 1994;3:95-104.
22. Estess JM, Topol EJ. Fibrinolytic treatment for elderly patients with acute myocardial infarction. *Heart* 2002;87:308-11.
23. Cucherat M, Bonnefoy E, Tremeau G. Primary angioplasty versus intravenous thrombolysis for acute myocardial infarction. *Cochrane Database Syst Rev* 2000;CD001560.
24. Fox KA, Poole-Wilson P, Clayton TC et al. 5-year outcome of an interventional strategy in non-ST-elevation acute coronary syndrome: the British Heart Foundation RITA 3 randomised trial. *Lancet* 2005;366:914-20.
25. Yusuf S, Zucker D, Peduzzi P et al. Effect of coronary artery bypass graft surgery on survival: overview of 10-year results from randomised trials by the Coronary Artery Bypass Graft Surgery Trialists Collaboration. *Lancet* 1994;344:563-70.
26. Freemantle N, Cleland J, Young P, Mason J, Harrison J. beta Blockade after myocardial infarction: systematic review and meta regression analysis. *BMJ* 1999;318:1730-7.
27. ACE Inhibitor Myocardial Infarction Collaborative Group. Indications for ACE inhibitors in the early treatment of acute myocardial infarction: systematic overview of individual data from 100,000 patients in randomized trials. ACE Inhibitor Myocardial Infarction Collaborative Group. *Circulation* 1998;97:2202-12.
28. Nichol G, Stiell IG, Hebert P, Wells GA, Vandemheen K, Laupacis A. What is the quality of life for survivors of cardiac arrest? A prospective study. *Acad Emerg Med* 1999;6:95-102.
29. Rea TD, Eisenberg MS, Culley LL, Becker L. Dispatcher-assisted cardiopulmonary resuscitation and survival in cardiac arrest. *Circulation* 2001;104:2513-6.
30. Nadkarni VM, Larkin GL, Peberdy MA et al. First documented rhythm and clinical outcome from in-hospital cardiac arrest among children and adults. *JAMA* 2006;295:50-7.

31. Tunstall-Pedoe H, Bailey L, Chamberlain DA, et al. Survey of 3765 cardiopulmonary resuscitations in British hospitals (the BRESUS Study): methods and overall results. *BMJ* 1992;304:1347-51.
32. Flather MD, Yusuf S, Kober L et al. Long-term ACE-inhibitor therapy in patients with heart failure or left-ventricular dysfunction: a systematic overview of data from individual patients. ACE-Inhibitor Myocardial Infarction Collaborative Group. *Lancet* 2000;355:1575-81.
33. Baigent C, Keech A, Kearney PM et al. Efficacy and safety of cholesterol-lowering treatment: prospective meta-analysis of data from 90,056 participants in 14 randomised trials of statins. *Lancet* 2005;366:1267-78.
34. Wilt TJ, Bloomfield HE, MacDonald R et al. Effectiveness of statin therapy in adults with coronary heart disease. *Arch Intern Med* 2004;164:1427-36.
35. Anand SS, Yusuf S. Oral anticoagulant therapy in patients with coronary artery disease: a meta-analysis. *JAMA* 1999;282:2058-67.
36. Lau J, Antman EM, Jimenez-Silva J, Kupelnick B, Mosteller F, Chalmers TC. Cumulative meta-analysis of therapeutic trials for myocardial infarction. *N Engl J Med* 1992;327:248-54.
37. Taylor RS, Brown A, Ebrahim S et al. Exercise-based rehabilitation for patients with coronary heart disease: systematic review and meta-analysis of randomized controlled trials. *Am J Med* 2004;116:682-92.
38. Kaiser C, Brunner-La Rocca HP, Buser PT et al. Incremental cost-effectiveness of drug-eluting stents compared with a third-generation bare-metal stent in a real-world setting: randomised Basel Stent Kosten Effektivitats Trial (BASKET). *Lancet* 2005;366:921-9.
39. Folland ED, Hartigan PM, Parisi AF. Percutaneous transluminal coronary angioplasty versus medical therapy for stable angina pectoris: outcomes for patients with double-vessel versus single-vessel coronary artery disease in a Veterans Affairs Cooperative randomized trial. Veterans Affairs ACME Investigators. *J Am Coll Cardiol* 1997;29:1505-11.
40. Pocock SJ, Henderson RA, Rickards AF et al. Meta-analysis of randomised trials comparing coronary angioplasty with bypass surgery. *Lancet* 1995;346:1184-9.
41. Bucher HC, Hengstler P, Schindler C, Guyatt GH. Percutaneous transluminal coronary angioplasty versus medical treatment for non-acute coronary heart disease: meta-analysis of randomised controlled trials. *BMJ* 2000;321:73-7.
42. Oler A, Whooley MA, Oler J, Grady D. Adding heparin to aspirin reduces the incidence of myocardial infarction and death in patients with unstable angina. A meta-analysis. *JAMA* 1996;276:811-5.
43. Boersma E, Harrington RA, Moliterno DJ et al. Platelet glycoprotein IIb/IIIa inhibitors in acute coronary syndromes: a meta-analysis of all major randomised clinical trials. *Lancet* 2002;359:189-98.
44. Shibata MC, Flather MD, Wang D. Systematic review of the impact of beta blockers on mortality and hospital admissions in heart failure. *Eur J Heart Fail* 2001;3:351-7.

45. Pitt B, Zannad F, Remme WJ et al. The effect of spironolactone on morbidity and mortality in patients with severe heart failure. Randomized Aldactone Evaluation Study Investigators. *N Engl J Med* 1999;341:709-17.
46. Garg R, Yusuf S. Overview of randomized trials of angiotensin-converting enzyme inhibitors on mortality and morbidity in patients with heart failure. Collaborative Group on ACE Inhibitor Trials. *JAMA* 1995;273:1450-6.
47. Law M, Wald N, Morris J. Lowering blood pressure to prevent myocardial infarction and stroke: a new preventive strategy. *Health Technol Assess* 2003;7:1-94.
48. Pignone M, Phillips C, Mulrow C. Use of lipid lowering drugs for primary prevention of coronary heart disease: meta-analysis of randomised trials. *BMJ* 2000;321:983-6.
49. Studer M, Briel M, Leimenstoll B, Glass TR, Bucher HC. Effect of different antilipidemic agents and diets on mortality: a systematic review. *Arch Intern Med* 2005;165:725-30.
50. Culley LL, Clark JJ, Eisenberg MS, Larsen MP. Dispatcher-assisted telephone CPR: common delays and time standards for delivery. *Ann Emerg Med* 1991;20:362-6.
51. Bunch TJ, White RD, Gersh BJ et al. Long-term outcomes of out-of-hospital cardiac arrest after successful early defibrillation. *N Engl J Med* 2003;348:2626-33.
52. Foody JM, Ferdinand FD, Galusha D et al. Patterns of secondary prevention in older patients undergoing coronary artery bypass grafting during hospitalization for acute myocardial infarction. *Circulation* 2003;108 Suppl 1:II24-8.:II24-II28.
53. Receipt of cardiac rehabilitation services among heart attack survivors--19 states and the District of Columbia, 2001. *MMWR Morb Mortal Wkly Rep* 2003;52:1072-5.
54. Shahi CN, Rathore SS, Wang Y et al. Quality of care among elderly patients hospitalized with unstable angina. *Am Heart J* 2001;142:263-70.
55. Peterson ED, Pollack CV, Jr., Roe MT et al. Early use of glycoprotein IIb/IIIa inhibitors in non-ST-elevation acute myocardial infarction: observations from the National Registry of Myocardial Infarction 4. *J Am Coll Cardiol* 2003;42:45-53.
56. Law MR, Wald NJ, Thompson SG. By how much and how quickly does reduction in serum cholesterol concentration lower risk of ischaemic heart disease? *BMJ* 1994;308:367-72.
57. Bogers RP, Hoogenveen RT, Boshuizen H. et al. Overweight and obesity increase the risk of coronary heart disease: a pooled analysis of 30 prospective studies. *European Journal of Epidemiology* 2006;21 (supplement):107.
58. James WPT, Jackson-Leach R, Mhurchu CN et al. Overweight and obesity (high body mass index). In: Ezzati M, Lopez AD, Rodgers A, Murray CJL, editors. *Comparative quantification of risk. Global and regional burden of disease attributable to selected major risk factors. Volume 1. Geneva: World Health Organization; 2004 p. 497-596.*
59. Marmot M, Elliot P. *Coronary heart disease epidemiology- from aetiology to public health. 2<sup>nd</sup> edition. 2<sup>nd</sup> edition ed. New York, NY: Oxford University Press; 2004.*

60. Law M, Wald N, Morris J. Lowering blood pressure to prevent myocardial infarction and stroke: a new preventive strategy. *Health Technol Assess* 2003;7:1-94.
61. Law M, Wald N, Wu T, Hackshaw A, Bailey A. Systematic underestimation of association between serum cholesterol concentration and ischaemic heart disease in observational studies: data from the BUPA study. *BMJ* 1994;308:363-6.
62. Vartiainen E, Puska P, Pekkanen J, Tuomilehto J, Jousilahti P. Changes in risk factors explain changes in mortality from ischaemic heart disease in Finland. *BMJ* 1994;309:23-7.
63. Yusuf S, Hawken S, Ounpuu S et al. Obesity and the risk of myocardial infarction in 27,000 participants from 52 countries: a case-control study. *Lancet* 2005;366:1640-9.
64. Sculpher MJ, Seed P, Henderson RA et al. Health service costs of coronary angioplasty and coronary artery bypass surgery: the Randomised Intervention Treatment of Angina (RITA) trial. *Lancet* 1994;344:927-30.
65. Capewell S, Morrison CE, McMurray JJ. Contribution of modern cardiovascular treatment and risk factor changes to the decline in coronary heart disease mortality in Scotland between 1975 and 1994. *Heart* 1999;81:380-6.
